# Supplementary material
Source: PubMed Central journal article supplement (PMC3335201)
Supplement: NIHMS99884-supplement-01.pdf [file NIHMS99884-supplement-01.pdf]

## Supplemental Data

### Optimal Timing of Inner Cell Mass Isolation Increases the Efficiency of Human Embryonic Stem Cell

#### Derivation and Allows Generation of Sibling Cell Lines

Alice E. Chen, Dieter Egli, Kathy Niakan, Jie Deng, Hidenori Akutsu, Mariko Yamaki, Chad Cowan, Claire Fitz-Gerald, Kun Zhang, Douglas A. Melton, and Kevin Eggan

#### SUPPLEMENTAL EXPERIMENTAL PROCEDURES

##### Embryo Culture and ICM Isolation

Human zygotes and cleavage stage embryos were thawed using Quinn's Advantage Thaw Kit (Sage) and cultured in Global medium (LifeGlobal) supplemented with 15% Plasmanate (Talecris) until they reached the blastocyst stage. Embryos were graded as described (Gardner et al., 2000). No blastocoel (grade 2), blastocyst (grade 3), expanded blastocyst (grade 4), hatching blastocysts (grade 5), hatched blastocyst (grade 6). ICM of grade A: tightly packed, many cells; ICM of grade B: loosely grouped, several cells; ICM of grade C: no ICM visible. TE was graded A: many cells forming a cohesive epithelium, or B: few cells forming a loose epithelium, or C: very few large cells. If cultured beyond day 6, embryos were switched to derivation medium. For poor quality embryos, we switched to conditioned ES cell media as early as day 5.

ICM isolation from these embryos was carried out by exposing the trophectoderm cells to 20-30 cell-lethal laser pulses from a Xyclone laser (Hamilton Thorne Biosciences) at an intensity of 500-700 $\mu$ s and subsequent removal of dead trophectoderm cells by using either piezo drill-assisted micromanipulation (Primetech), or by aspiration into a 50-75 $\mu$ m glass capillary pipette (**Fig. S1B**). A similar technique using the laser to isolate the ICM was recently reported by others (Turetsky et al., 2008), and isolation of the ICM by mechanical instead of enzymatic methods has also been reported elsewhere (Wang et al., 2005). A small number of lysed or living trophectoderm cells can be left attached to the ICM, as it does not interfere with ICM attachment to the fibroblast feeder layer, or with ES cell outgrowth. The isolated ICM (**Fig. S1C**) was then plated on a 95% confluent feeder layer of freshly plated gamma-irradiated mouse embryonic fibroblasts (MEFs), isolated from E12.5 embryos and passaged 3 times before irradiation, in hESC derivation media, a media conditioned for 24h by HUES9 cells grown on MEFs. This hESC derivation media consisted of 75% KO-DMEM (Invitrogen), 10% KO-SR replacement (Invitrogen), 10% Plasmanate (Talecris), 2.5% ES cell-tested Fetal Bovine Serum (FBS) (Hyclone), 2mM Glutamax-I, 1% non-essential amino acids, 50units/ml penicillin and 50 $\mu$ g/ml streptomycin (Invitrogen), 0.055mM  $\beta$ -mercaptoethanol (Invitrogen), 5ng/ml bFGF (Invitrogen), as described in (Akutsu et al., 2006; Sullivan et al., 2007) and was generated by exposure to a

growing culture of hESCs for 1 day, sterile filtering, and then a 1:1 dilution with non-conditioned medium (see also (Zhang et al., 2006)). When the hESC outgrowth reached a size of 0.5mm or more, usually 7 to 16 days after ICM plating, it was mechanically dispersed (Chen and Melton, 2007) and plated onto a new MEF feeder cell layer with conditioned derivation media (passage 1). The secondary colonies (**Fig. S1I**) that resulted were similarly dispersed until passage 2-5. The FBS content of the culture media was also eliminated during these initial passages to minimize ES cell differentiation. Cells were then further expanded using STEMPRO EZPassage (Invitrogen), or enzymatic passaging (**Fig.S1J**). Upon confirmation of embryonic stem cell identity by pluripotency and differentiation analyses (See Fig S2), all Harvard University lines are named according to their order of derivation as “HUES#”.

To request stem cell lines, consult Table S2 for availability for distribution. More information can be found at (<http://www.mcb.harvard.edu/melton/hues>).

### **Immunohistochemistry of Human Preimplantation Stage Embryos**

Human embryos were fixed in 4% paraformaldehyde at 4°C overnight. Washes were performed in PBS/0.1% Tween-20 (PBS/T). Permeabilization was performed in 0.5% PBS/T. Primary antibody incubations were diluted in 10% fetal bovine serum in 0.1% PBS/T overnight at 4°C. The following primary antibodies were used at the following dilutions: 1:500 of 0.6 mg immunoglobulin/ml monoclonal mouse anti-Cdx2 (CDX2-88, BioGenex, CA, USA); 1:500 of polyclonal rabbit anti-Oct4 (H134; Santa Cruz Biotechnology). Secondary antibodies (Cy3 or FITC donkey anti-rabbit or -mouse) were used at 1:300 (Molecular Probes, Invitrogen). Embryos were placed in 1:3 dilutions of Vectashield containing DAPI (Vector Labs): 0.1% PBS/T and placed onto coverslip dishes (MatTek) for imaging. (Alternatively, embryos were also permeabilized in 1% PBS/T). Imaging was performed on a Leica confocal microscope (LSM 510) using Meta software analysis. Cell numbers were counted using the IMARIS cell imaging software.

### **Microarray Analysis**

Total RNA was isolated using Trizol (Invitrogen). RNA labeling and hybridization was done with the Illumina HumanRef-8 v3 beadchip and analyzed using BeadStudio and Bioconductor.

### **Genetic Analysis and Karyotyping**

Genomic and mitochondrial DNA were isolated with the Qiagen DNAeasy tissue kit and the hypervariable region I (HVI) of the mitochondrial DNA (position 15983-16385) was amplified and sequenced using primers Mth1 5'-caccattagcaccacaaagct-3' and Mth2 5'-tgatttcacggaggatggtg-3'. DNA alignment was done using Clustalw (<http://www.ebi.ac.uk/>), and Boxshade (<http://www.ch.embnet.org/>) using default parameters.

Karyotypes were done by the UMass Memorial Center, Cytogenetics Laboratory, Worcester, MA, USA. STR analysis was done by Global Stem Inc., Rockville MD, USA.

## SUPPLEMENTAL REFERENCES

Akutsu, H., Cowan, C.A., and Melton, D. (2006). Human embryonic stem cells. *Methods Enzymol* 418, 78-92.

Anderson, S., Bankier, A.T., Barrell, B.G., de Bruijn, M.H., Coulson, A.R., Drouin, J., Eperon, I.C., Nierlich, D.P., Roe, B.A., Sanger, F., *et al.* (1981). Sequence and organization of the human mitochondrial genome. *Nature* 290, 457-465.

Chen, A.E., and Melton, D.A. (2007). Derivation of Human Embryonic Stem Cells by Immunosurgery. *Journal of Visualized Experiments*, doi:10.3791/3574

Cowan, C.A., Klimanskaya, I., McMahon, J., Atienza, J., Witmyer, J., Zucker, J.P., Wang, S., Morton, C.C., McMahon, A.P., Powers, D., *et al.* (2004). Derivation of embryonic stem-cell lines from human blastocysts. *N Engl J Med* 350, 1353-1356.

Lerou, P.H., Yabuuchi, A., Huo, H., Takeuchi, A., Shea, J., Cimini, T., Ince, T.A., Ginsburg, E., Racowsky, C., and Daley, G.Q. (2008). Human embryonic stem cell derivation from poor-quality embryos. *Nat Biotechnol* 26, 212-214.

Stojkovic, M., Lako, M., Stojkovic, P., Stewart, R., Przyborski, S., Armstrong, L., Evans, J., Herbert, M., Hyslop, L., Ahmad, S., *et al.* (2004). Derivation of human embryonic stem cells from day-8 blastocysts recovered after three-step in vitro culture. *Stem Cells* 22, 790-797.

Sullivan, S., Cowan, C.A., and Eggan, K. (2007). *Human Embryonic Stem Cells - A Practical Handbook* (Wiley).

Thomson, J.A., Itskovitz-Eldor, J., Shapiro, S.S., Waknitz, M.A., Swiergiel, J.J., Marshall, V.S., and Jones, J.M. (1998). Embryonic stem cell lines derived from human blastocysts. *Science* 282, 1145-1147.

Turetsky, T., Aizenman, E., Gil, Y., Weinberg, N., Shufaro, Y., Revel, A., Laufer, N., Simon, A., Abeliovich, D., and Reubinoff, B.E. (2008). Laser-assisted derivation of human embryonic stem cell lines from IVF embryos after preimplantation genetic diagnosis. *Hum Reprod* 23, 46-53.

Wang, Q., Fang, Z.F., Jin, F., Lu, Y., Gai, H., and Sheng, H.Z. (2005). Derivation and growing human embryonic stem cells on feeders derived from themselves. *Stem Cells* 23, 1221-1227.

Zhang, X., Stojkovic, P., Przyborski, S., Cooke, M., Armstrong, L., Lako, M., and Stojkovic, M. (2006). Derivation of human embryonic stem cells from developing and arrested embryos. *Stem Cells* 24, 2669-2676.

# Supplemental Figure 1

50µm Preimplantation development

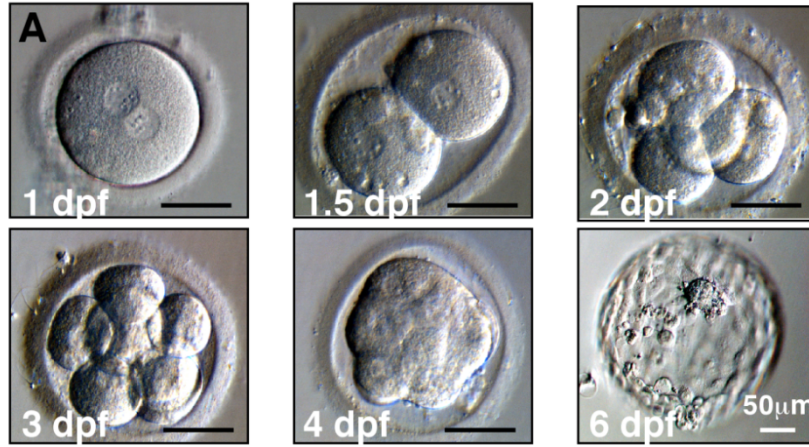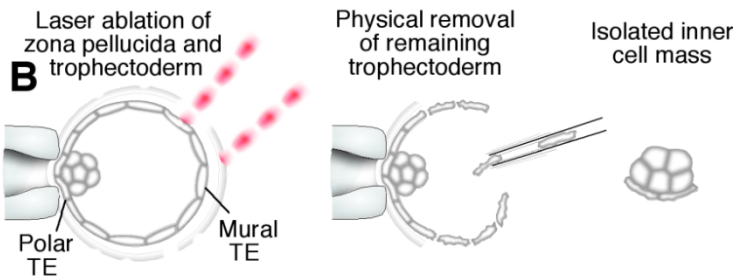

Blastocyst 6 dpf

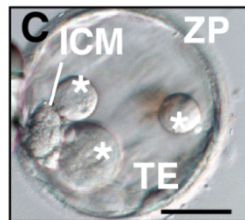

Isolated ICM d0

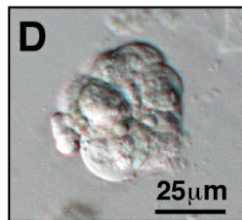

Attachment site d3

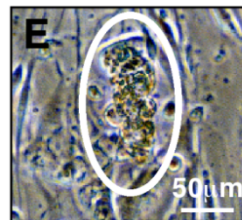

ICM outgrowth d6

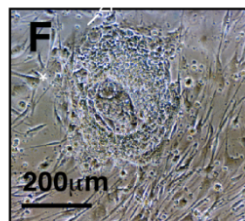

ICM outgrowth d8

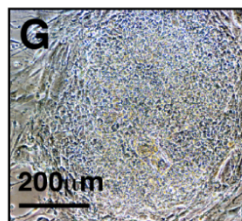

picking of outgrowth d12

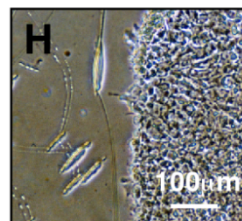

Picked colony d17

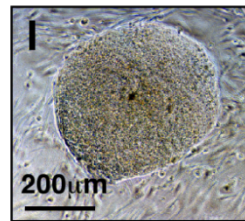

ES cell line p7

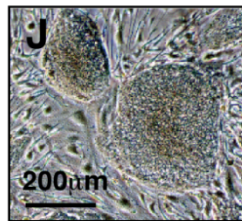

Karyotype p14

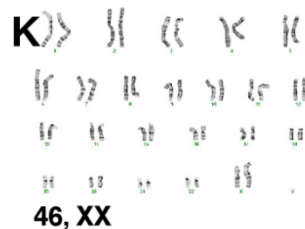

**Figure S1. Derivation of Pluripotent ES Cells by Laser Surgery of Human Embryos**

(A) Development of preimplantation embryos from the zygote stage to the expanded blastocysts stage. Dpf, days post-fertilization. (B) Schematic of inner cell mass (ICM) isolation. In multiple pulses, the zona pellucida (ZP) and most of the trophectoderm (TE) are targeted. Ablation of polar TE is avoided. Dead cells and remaining living TE cells are removed by a blunt glass pipette coupled to a piezo microaccentuator. (C) Human blastocyst at day 6 dpf before ICM isolation. Asterisk, blastomeres that were excluded from the developing blastocyst. (D) Isolated ICM on day 0 (d0), consisting of approximately 10 cells. (E-G) Attachment and outgrowth of the ICM into an embryonic stem cell colony (circled). Days of culture following isolation of the ICM are indicated. (H) Picking of a hESC outgrowth. Typical ES cell morphology is readily visible at high magnification. (I, J) Primary outgrowth is broken up into several colonies and passaged to give rise to a hESC line. The scale bar of 50mm is valid for panels A-J, except where otherwise indicated. (K) Chromosome analysis of cell line above shows a normal 46, XX female karyotype.

## Supplemental Figure 2

### Undifferentiated hESC culture

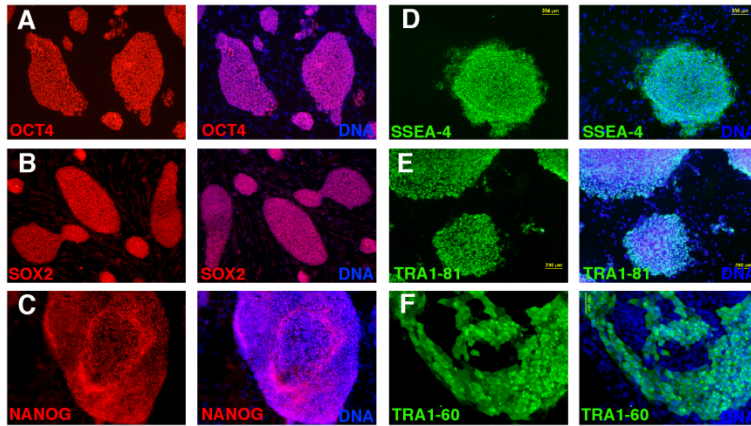

### Differentiation into cell types of three germ layers *in vitro*

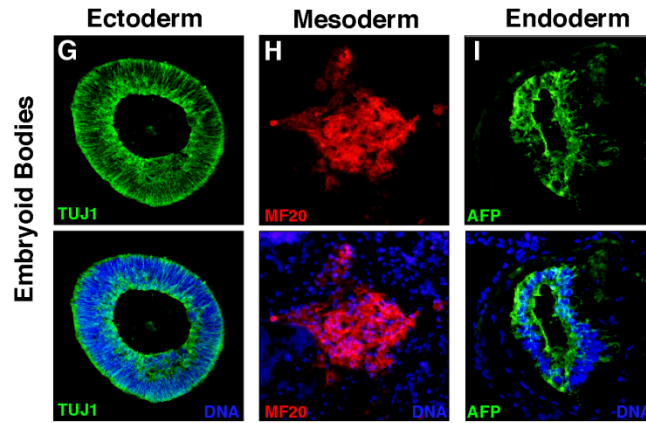

### Differentiation into cell types of three germ layers *in vivo*

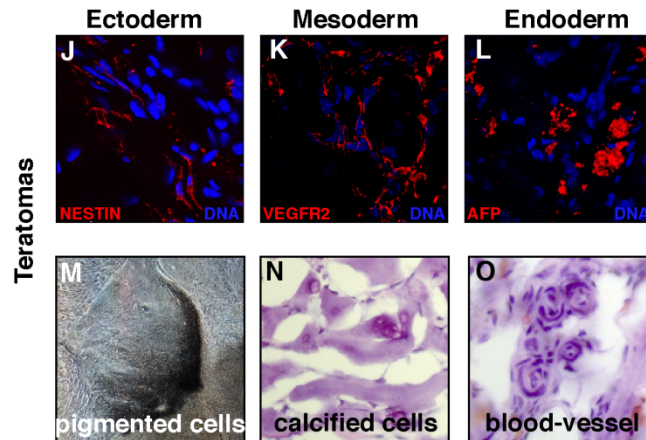

**Figure S2. HESCs Isolated by Laser Surgery are Pluripotent**

(A-F) In the undifferentiated state, cell lines derived by laser surgery express markers characteristic of pluripotent hESCs including OCT4, SOX2, NANOG, SSEA-4, TRA1-81, and TRA1-60. (G-I) hESCs differentiated *in vitro* via embryoid bodies express markers of the primary germ layers. Shown are immunohistochemical analyses using markers of the ectoderm (TUJ1), mesoderm (MF20), endoderm (AFP). HESCs differentiated *in vivo* via teratoma formation. (J-L) Immunohistochemical analyses using markers of the ectoderm (NESTIN), mesoderm (VEGFR2), and endoderm (AFP). (M) Pigmented cells formed in adherent culture (ectoderm). (N, O) Hematoxylin and Eosin staining reveal germ layer derivatives such as calcified cells (mesoderm) and blood vessels (mesoderm).





## Supplemental Figure 4

Maturation of blastocysts after prolonged *in vitro* culture

change in cell size and TE morphology

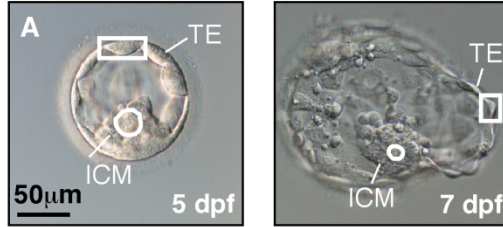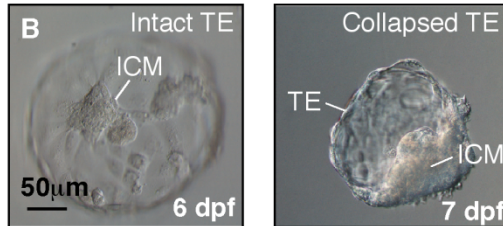

HUES cell lines can be derived on different days of development

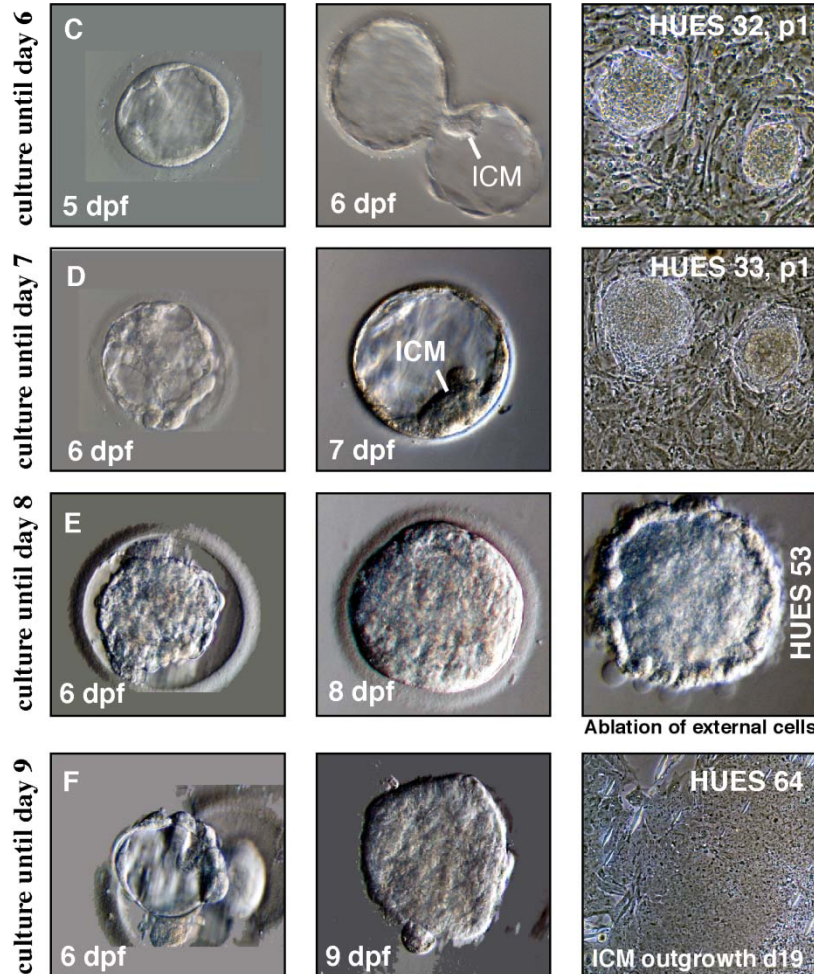

### **Figure S4. Blastocysts Yield Stem Cells on Different Days of Development**

Extended *in vitro* culture allows for maturation of healthy blastocysts and improved development of poor quality blastocysts. (A) A healthy blastocyst on day 5 post-fertilization (dpf) (3AA) and on day 7 (5AA). Note that individual cells of the inner cell mass (ICM; circled), and the trophectoderm (TE; boxed), decrease in size while their number increases after prolonged culture. (B) A healthy blastocyst on day 6 (5AA) and day 7. Note the expanded TE on day 6 and subsequent collapse and deterioration of TE on day 7. Despite deterioration of TE morphology, the ICM expands. (C) A blastocyst on day 5 post-fertilization without a discernible ICM (3CA) and on day 6 with a distinct ICM (5AA). (D) A poor quality blastocyst on day 6 (3CC) without an apparent ICM and on day 7 with a distinct ICM (3BB). (E) A poor quality blastocyst on day 6 (3CC) and after 2 days of culture on day 8. Following ablation of external cells with the laser, a hESC line was derived. (F) Poor quality blastocyst on day 6 (3CC) and on day 9. Embryos were cultured in hESC-conditioned derivation medium from days 5 or 6 post-fertilization.

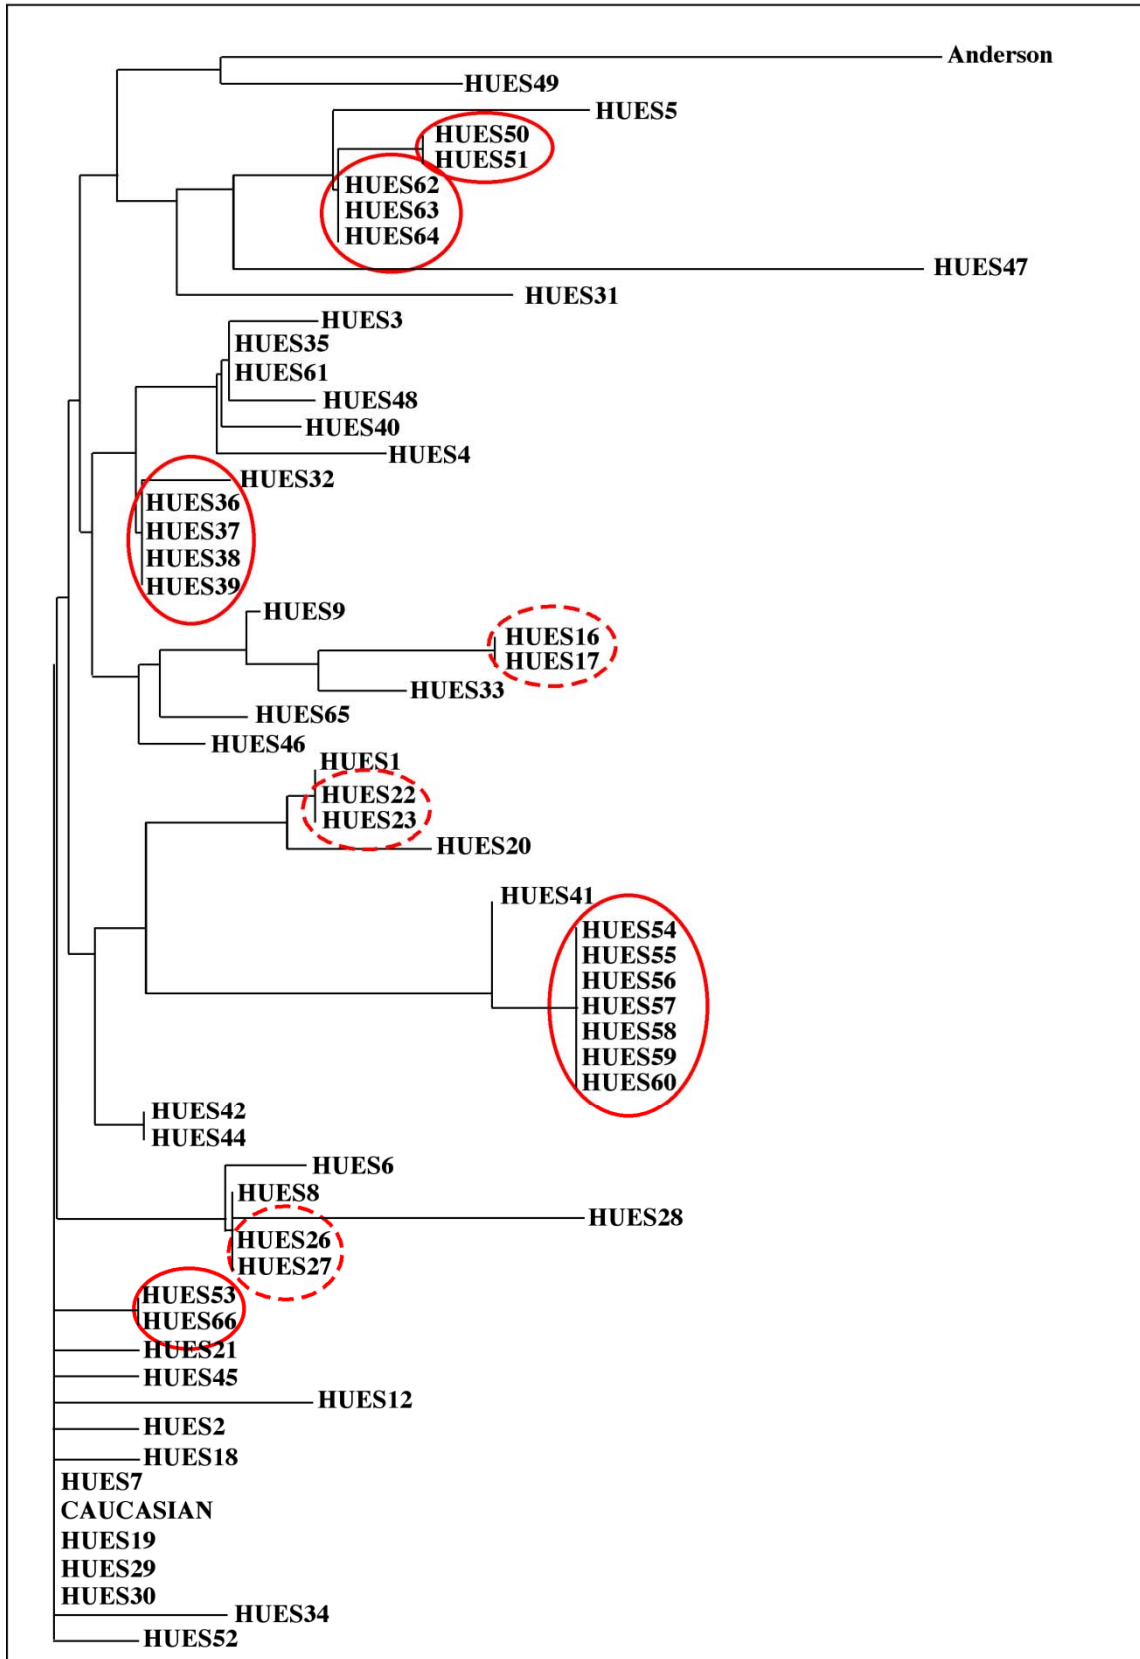

**Figure S5. Dendrogram of Mitochondrial DNA Sequence of the Hypervariable Region I**

Note the identical sequence of sibling cell lines HUES 54-60, HUES 66 and 53, HUES 36-39, HUES 62-64, and HUES 50-51, circled, and HUES 16 and 17, HUES 22 and 23, and HUES 26 and 27. Most other cell lines are different, demonstrating independent origin. The reference sequences are a Caucasian (helvetic) sequence, and the published Anderson sequence (Anderson et al., 1981). For cell lines with dotted circles, documentation of IVF history was not available but mitochondrial sequencing suggests sibling relations (see also **Figure S6 and Table S4**). The IVF history of fully circled lines is known and agrees with the genetic data of identical parenthood.

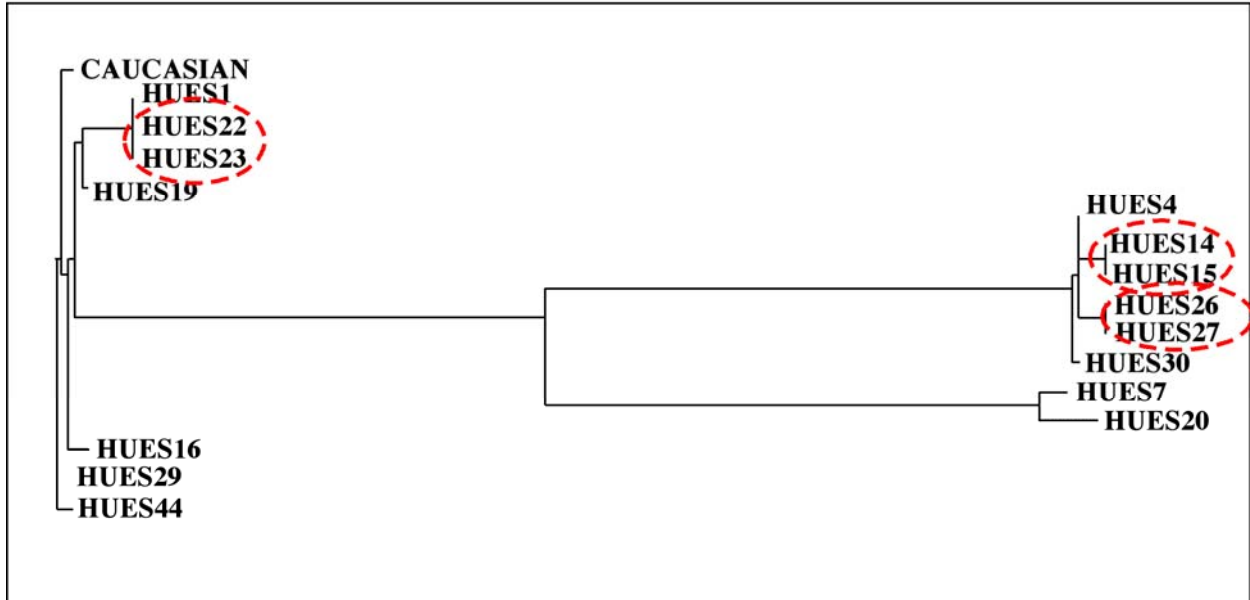

**Figure S6. Dendrogram of Mitochondrial DNA Sequence of the Hypervariable Region II**  
 Select hESC lines were analyzed at hypervariable region II. Most of them differed in sequence, sibling stem cell lines are circled. HUES 14 and 15 (Cowan et al. 2004), HUES 22 and 23, and HUES 26 and 27 are sibling stem cell lines, but their IVF history was not available (see also **Table S4**).

**Table S1. Variations in Derivation Efficiency Using the Published Protocol (Cowan et al., 2004).**

| Authors                  | Method        | # ICM isolated | # cell lines | % derivation efficiency <sup>*</sup> |
|--------------------------|---------------|----------------|--------------|--------------------------------------|
| Cowan <i>et al.</i> 2004 | Immunosurgery | 97             | 17           | 18%                                  |
| Experiment A             | Immunosurgery | 8              | 2            | 25%                                  |
| Experiment B             | Immunosurgery | 14             | 7            | 50%                                  |
| Experiment C             | Immunosurgery | 5              | 2            | 40%                                  |
| Experiment D             | Immunosurgery | 8 (day 5-6)    | 1            | 13%                                  |
| Total Experiments A to D | Immunosurgery | 35             | 12           | 34%                                  |

Derivation efficiency varied between different experiments using identical methods. The embryonic day of development was not taken into consideration in experiments A-C. <sup>\*</sup>expressed as % according to the number of cell lines obtained per total number of ICMs isolated for derivation.

**Table S2. Characterization of Human Embryonic Stem Cell Lines 18-66**

Cell lines with limited availability for distribution can only be used for studies related to diabetes and endoderm due to consent restrictions. # Within the population of karyotypically normal cells, a few karyotypically abnormal cells were also detected (e.g. 3 of 20). \* Pluripotency markers that were tested are indicated. In all cases, the tested markers were present. All cell lines showed low levels of spontaneous differentiation in culture. Consistent with previous reports, all hESC lines derived thus far express the same set of pluripotency markers and have the ability to differentiate into various tissues (The International Stem Cell Initiative, 2007). EB: embryoid body, dpf: days post-fertilization, ND: not determined. \*\* this line was produced by aggregation of blastomeres from two poor quality embryos to form a single blastocysts and may therefore be mosaic.

| Cell line | Embryo Quality (dpf) | Isolation method, day of isolation, (quality) | Karyotype                            | Pluripotency marker expression tested *        | Differentiation         | Available for distribution |
|-----------|----------------------|-----------------------------------------------|--------------------------------------|------------------------------------------------|-------------------------|----------------------------|
| HUES 18   | ND                   | Immunosurgery, ND                             | 46, XY # (p13)                       | ND                                             | Spontaneous             | yes                        |
| HUES 19   | ND                   | Immunosurgery, ND                             | 46, XY # (p21)                       | ND                                             | Spontaneous             | yes                        |
| HUES 20   | ND                   | Immunosurgery, ND                             | 46,XY (p15)                          | ND                                             | Spontaneous             | yes                        |
| HUES 21   | ND                   | Immunosurgery, ND                             | 46,XX (p13)                          | ND                                             | Spontaneous             | yes                        |
| HUES 22   | ND                   | Immunosurgery, ND                             | 46,XY                                | OCT4, SSEA4, TRA1-81, TRA1-60                  | Spontaneous/Teratoma    | yes                        |
| HUES 23   | ND                   | Immunosurgery, ND                             | 46,XX,der(2)t(2;17)(q37;q11.2) (p14) | OCT4, SSEA4, TRA1-81, TRA1-60                  | Spontaneous/Teratoma    | yes                        |
| HUES 24   | ND                   | Immunosurgery, ND                             | 47,XY # (p14)                        | OCT4, SSEA4, TRA1-81, TRA1-60                  | Spontaneous/Teratoma    | yes                        |
| HUES 25   | ND                   | Immunosurgery, ND                             | ND                                   | ND                                             | Spontaneous             | yes                        |
| HUES 26   | ND                   | Immunosurgery, ND                             | 46,XY (p13)                          | ND                                             | Spontaneous             | yes                        |
| HUES 27   | ND                   | Immunosurgery, ND                             | 46, XY (p13)                         | ND                                             | Spontaneous             | yes                        |
| HUES 28   | ND                   | Immunosurgery, ND                             | 46, XX (p14)                         | OCT4, SSEA4, TRA1-81, TRA1-60                  | Spontaneous/Teratoma    | yes                        |
| HUES 29   | 3BB (day 6)          | Immunosurgery, day 6 (3BB)                    | 45, XX,-21                           | OCT4, SSEA4, TRA1-81, AP                       | Spontaneous             | no                         |
| HUES 30   | 3AB (day 6)          | Laser, day 6 (3AB)                            | 46,XX (p14)                          | AP, OCT4, SSEA4, SOX2, TRA1-81, NANOG          | Spontaneous/EB/Teratoma | no                         |
| HUES 31   | 4AA (day 5)          | Laser, day 5 (4AA)                            | 46,XX (p11)                          | AP, OCT4, NANOG, TRA1-81                       | Spontaneous             | no                         |
| HUES 32   | 3CC (day 6)          | Immunosurgery, day 7 (5AA)                    | 46, XY (p6)                          | ND                                             | Spontaneous             | no                         |
| HUES 33   | 2CC (day 6)          | Immunosurgery, day 7 (4AB)                    | 46, XX (p7)                          | OCT4                                           | Spontaneous             | no                         |
| HUES 34   | 3CB (day 6)          | Laser, day 7 (4AA)                            | 46, XX (p15)                         | AP, OCT4, SSEA4, SOX2, TRA1-81, NANOG, TRA1-60 | Spontaneous/EB          | no                         |
| HUES 35   | 3CB (day 6)          | Laser, day 8 (filled cavity)                  | Male                                 | AP, OCT4, SOX2, TRA1-81, NANOG, TRA1-60        | Spontaneous/EB/Teratoma | no                         |
| HUES 36   | 4CA (day 5)          | Immunosurgery, day 6 (4AA)                    | 46, XX, (p11)                        | AP, OCT4, SSEA4, SOX2, TRA1-81, NANOG, TRA1-60 | Spontaneous/EB          | no                         |
| HUES 37   | 3BB (day 5)          | Immunosurgery, day 6 (5AA)                    | 46, XX (p8)                          | OCT4, SSEA4, TRA1-81, TRA1-60                  | Spontaneous             | no                         |
| HUES 38   | 3AA (day 6)          | Laser, day 7 (5AA)                            | Male                                 | ND                                             | Spontaneous             | no                         |
| HUES 39   | 3BC (day 5)          | Laser, day 6 (4BA)                            | Female                               | OCT4, TRA1-81, TRA1-60                         | Spontaneous/EB          | no                         |



|         |                        |                               |                  |                                      |                         |       |
|---------|------------------------|-------------------------------|------------------|--------------------------------------|-------------------------|-------|
| HUES 40 | 5AA (day 6)            | Laser, day 7 (6AA)            | 46, XX (p12)     | OCT4, SSEA4, SOX2,<br>NANOG, TRA1-60 | Spontaneous/EB          | no    |
| HUES 41 | 3BB (day 5)            | Laser, day 7 (6BC)            | Female           | AP, OCT4, SSEA4, SOX2,<br>TRA1-81    | Spontaneous/EB/Teratoma | no    |
| HUES 42 | 4AA (day 6)            | Laser, day 7 (5AA)            | 46, XY (p16)     | OCT4, TRA1-81                        | Spontaneous/EB/Teratoma | yes   |
| HUES 43 | 2CC (day 6)            | Laser, day 8 (clump of cells) | ND               | ND                                   | Spontaneous             | no    |
| HUES 46 | 3BB (day 6)            | No isolation                  | 46, XX (p5)      | ND                                   | Spontaneous             | no    |
| HUES 48 | 4BB (day6)             | Laser, day 9 (filled cavity)  | 46, XX (p9)      | OCT4, NANOG, TRA 1-81                | Spontaneous             | yes** |
| HUES 49 | 5AA (day 6)            | Laser, day 9 (filled cavity)  | 46, XX (p6)      | OCT4, NANOG                          | Spontaneous             | yes   |
| HUES 50 | 5AA (day 6)            | Laser, day 6 (5AA)            | 47, XX, +14 (p9) | OCT4, NANOG                          | Spontaneous             | no    |
| HUES 51 | 3BB (day 6)            | Laser, day 7 (4AB)            | Female           | OCT4, NANOG                          | Spontaneous             | no    |
| HUES 52 | 6AA (day 6)            | Laser, day 6 (6AA)            | Female           | OCT4, NANOG, TRA1-60                 | Spontaneous             | no    |
| HUES 53 | 3BB (day 6)            | Laser, day 8 (filled cavity)  | 46, XY (p9)      | OCT4, NANOG, TRA1-60,<br>TRA1-81     | Spontaneous             | yes   |
| HUES 54 | Clump of cells (day 6) | Laser, day 7 (clump of cells) | Female           | OCT4, NANOG                          | Spontaneous             | no    |
| HUES 55 | 3BB (day 6)            | Laser, day 7 (3AB)            | Female           | OCT4, NANOG                          | Spontaneous             | no    |
| HUES 56 | 4AA (day 6)            | Laser, day 6 (4AA)            | Male             | OCT4, NANOG, TRA1-60                 | Spontaneous             | no    |
| HUES 57 | 2CC (day6)             | Laser, day 8 (clump of cells) | 46,XX (p9)       | ND                                   | Spontaneous             | no    |
| HUES 58 | 5AA (day 6)            | Laser, day 6 (5AA)            | Female           | OCT4, NANOG                          | Spontaneous             | no    |
| HUES 59 | 3CC (day 6)            | Laser, day 7 (filled cavity)  | Nd               | OCT4, NANOG                          | Spontaneous             | no    |
| HUES 60 | 4AA (day 6)            | Laser, day 6 (4AA)            | Male             | OCT4, NANOG                          | Spontaneous             | no    |
| HUES 61 | 4AA (day 6)            | Laser, day 6 (4AA)            | 46, XX (p9)      | OCT4, NANOG, TRA1-60                 | Spontaneous             | no    |
| HUES 62 | 4AB (day 6)            | Laser, day 6 (4AB)            | 46, XX (p6)      | OCT4, NANOG                          | Spontaneous             | yes   |
| HUES 63 | 5AA (day 6)            | Laser, day 6 (5AA)            | 46, XY (p12)     | OCT4, NANOG                          | Spontaneous             | yes   |
| HUES 64 | 3CC (day 6)            | Laser, day 9 (filled cavity)  | 46, XY (p9)      | OCT4, NANOG                          | Spontaneous             | yes   |
| HUES 65 | 4AA (day 6)            | Laser, day 9 (filled cavity)  | 46, XY (p10)     | OCT4, NANOG                          | Spontaneous             | yes   |

HUES 66

3AB (day 6)

Laser, day 8 (filled cavity)

Female

OCT4, NANOG, TRA1-60

Spontaneous, EB

yes

**Table S3. Derivation of Sibling Cell Lines**

| Donor couple # | # of cleavage stage embryos donated | # of blastocysts | # of cell lines |
|----------------|-------------------------------------|------------------|-----------------|
| 217            | 10                                  | 7                | 4 (HUES 36-39)  |
| 324            | 19                                  | 5                | 7 (HUES 54-60)  |
| 398            | 14                                  | 5                | 3 (HUES 62-64)  |
| 230            | 15                                  | 7                | 2 (HUES 50, 51) |
| 291            | 3                                   | 3                | 2 (HUES 53, 66) |
| Total          | 61                                  | 27               | 18              |

In addition to these 18 lines, HUES 22 and HUES 23, as well as HUES 26 and HUES 27 are sibling cell lines (Fig. S5-S6, Table S4). IVF history was not available for the sibling cell lines, HUES 22 and 23, HUES 26 and 27, HUES 14 and 15 (Cowan et al. 2004), and HUES 16 and 17 (Cowan et al. 2004).

**Table S4. Short Tandem Repeat (STR) Profiles of Human Embryonic Stem Cell Lines 1-66**

Length of STR fragments at each locus is listed. \* Lower levels than other co-alleles, indicating mosaicism. Colored cell lines are siblings. Sibling cell lines share a high number of identical alleles. E.g. HUES 22 and HUES 23 share 21 of 30 alleles, while two unrelated cell lines, HUES 47 and HUES 48 share 7 alleles. HUES 14 and HUES 15, as well as HUES 16 and HUES 17 (see Cowan et al. 2004), are most likely sibling cell lines. Together with the lines reported here, there are a total number of 26 sibling cell lines, 13 of which are available for distribution.

| Hues ID | passage number | Amelogenin | vWa   | D8S1179 | TPOX  | FGA   | D3S1358 | THO1    | D21S11    | D18S51 | PentaE | D5S818 | D13S317 | D7S820 | D16S539 | CSF1PO | PentaD | D2S1338 | D19S433 |
|---------|----------------|------------|-------|---------|-------|-------|---------|---------|-----------|--------|--------|--------|---------|--------|---------|--------|--------|---------|---------|
| HUES 1  | 25             | X,X        | 17,18 | 10,12   | 8,9   | 21,23 | 15,18   | 7,9     | 28,30     | 13,13  | 7,10   | 11,12  | 11,12   | 10,10  | 8,12    | 12,12  | 9,12   | ND      | ND      |
| HUES 2  | 24             | X,Y        | 14,16 | 8,12    | 9,11  | 18,23 | 14,18   | 5,6     | 31,32     | 12,16  | 7,15   | 11,12  | 11,12   | 9,13   | 11,13   | 12,12  | 11,13  | ND      | ND      |
| HUES 3  | 36             | X,Y        | 16,17 | 12,13   | 8,11  | 22,24 | 15,16   | 7,8     | 28,29     | 13,17  | 11,12  | 12,12  | 8,14    | 8,11   | 12,14   | 11,12  | 9,12   | ND      | ND      |
| HUES 4  | 25             | X,Y        | 15,17 | 13,15   | 8,8   | 23,23 | 17,17   | 6,6     | 30,31     | 12,19  | 16,16  | 12,13  | 9,11    | 8,10   | 12,12   | 11,12  | 9,10   | ND      | ND      |
| HUES 5  | 18             | X,X        | 15,17 | 12,14   | 11,11 | 20,20 | 15,18   | 7,9     | 27,28     | 13,16  | 10,11  | 11,12  | 11,13   | 11,12  | 12,13   | 12,12  | 10,12  | ND      | ND      |
| HUES 6  | 24             | X,X        | 15,16 | 10,13   | 9,11  | 23,24 | 16,18   | 8,9.3   | 30,30     | 12,14  | 12,12  | 12,12  | 11,11   | 8,11   | 10,11   | 11,12  | 9,10   | ND      | ND      |
| HUES 7  | 19             | X,Y        | 16,18 | 10,11   | 8,8   | 25,25 | 15,18   | 6,9.3   | 27,32.2   | 14,15  | 7,13   | 11,13  | 11,12   | 8,11   | 11,12   | 12,12  | 9,11   | ND      | ND      |
| HUES 8  | 28             | X,Y        | 15,19 | 13,13   | 8,11  | 20,25 | 15,19   | 7,9     | 28,29     | 12,16  | 7,10   | 11,11  | 12,14   | 11,12  | 9,12    | 10,12  | 10,11  | ND      | ND      |
| HUES 9  | 27             | X,X        | 17,19 | 9,12    | 8,9   | 19,21 | 17,18   | 8,9     | 29,30     | 12,13  | 10,12  | 12,12  | 11,12   | 8,12   | 12,13   | 10,10  | 9,13   | ND      | ND      |
| HUES 10 | 16             | X,Y        | 16,17 | 12,13   | 8,8   | 19,19 | 14,18   | 9.3,9.3 | 29,30     | 12,13  | ND     | 11,11  | 11,12   | 12,13  | 12,13   | 10,13  | ND     | 29,30   | 15,16.2 |
| HUES 11 | 30             | X,Y        | 14,16 | 12,15   | 8,8   | 23,24 | 15,17   | 6,7     | 27,28     | 16,17  | 5,14   | 11,12  | 11,12   | 12,12  | 12,12   | 12,13  | 13,14  | ND      | ND      |
| HUES 12 | 21             | X,X        | 16,18 | 13,13   | 8,11  | 23,24 | 15,17   | 6,7     | 27,28     | 14,17  | 7,16   | 11,12  | 11,13   | 9,13   | 12,13   | 10,12  | 13,16  | ND      | ND      |
| HUES 13 |                |            |       |         |       |       |         |         |           |        |        |        |         |        |         |        |        |         |         |
| HUES 14 | 21             | X,X        | 16,18 | 10,11   | 9,11  | 20,20 | 15,17   | 7,7     | 28,30     | 15,19  | 9,18   | 10,12  | 9,11    | 7,10   | 9,11    | 10,12  | 10,13  | ND      | ND      |
| HUES 15 | 17             | X,X        | 16,18 | 11,13   | 8,11  | 20,21 | 17,18   | 7,7     | 28,30     | 13,15  | 16,18  | 11,12  | 9,9     | 10,10  | 9,10    | 10,12  | 10,12  | ND      | ND      |
| HUES 16 | 19             | X,Y        | 16,17 | 10,13   | 8,8   | 21,21 | 16,17   | 7,9.3   | 30.2,32.2 | 12,15  | 7,15   | 11,12  | 11,12   | 8,10   | 12,13   | 11,12  | 11,11  | ND      | ND      |
| HUES 17 | 23             | X,Y        | 16,18 | 10,13   | 8,9   | 21,22 | 16,17   | 7,9.3   | 29,30.2   | 12,15  | 7,15   | 11,12  | 11,12   | 8,10   | 12,13   | 11,12  | 11,13  | ND      | ND      |
| HUES 18 | 13             | X,Y        | 15,17 | 12,14   | 8,11  | 23,26 | 15,15   | 6,9     | 30,31.2   | 14,21  | 7,12   | 11,11  | 11,11   | 10,10  | 9,11    | 10,11  | 9,13   | ND      | ND      |
| HUES 19 | 23             | X,Y        | 18,20 | 13,15   | 8,11  | 20,24 | 15,16   | 7,8     | 28,30     | 14,19  | 11,12  | 11,11  | 12,13   | 10,13  | 11,11   | 10,11  | 10,11  | ND      | ND      |
| HUES 20 | 15             | X,Y        | 15,19 | 13,14   | 11,11 | 21,25 | 15,18   | 8,9.3   | 29,30     | 12,13  | 12,12  | 12,12  | 9,11    | 10,10  | 11,12   | 12,12  | 9,13   | ND      | ND      |
| HUES 21 | 13             | X,X        | 18,19 | 13,14   | 9,11  | 20,22 | 15,16   | 6,8     | 30,30     | 13,13  | 8,12   | 12,12  | 11,11   | 10,11  | 11,13   | 10,11  | 9,12   | ND      | ND      |
| HUES 22 | 15             | X,Y        | 16,18 | 14,14   | 8,11  | 21,24 | 16,16   | 6,6     | 30,30.2   | 13,15  | 5,12   | 11,12  | 11,11   | 8,10   | 9,12    | 10,11  | 13,14  | ND      | ND      |

|         |    |     |        |       |       |       |           |         |           |             |       |       |       |       |          |       |       |       |         |
|---------|----|-----|--------|-------|-------|-------|-----------|---------|-----------|-------------|-------|-------|-------|-------|----------|-------|-------|-------|---------|
| HUES 23 | 14 | X,X | 17,17  | 14,15 | 11,12 | 21,24 | 14,16     | 6,6     | 30,30.2   | 13,16       | 5,12  | 11,12 | 11,11 | 8,11  | 11,12    | 10,11 | 13,13 | ND    | ND      |
| HUES 24 | 8  | X,Y | 17,17  | 10,13 | 8,9   | 21,24 | 11,17     | 6,7     | 30,30     | 13,18       | ND    | 10,12 | 12,14 | 9,9   | 9,12     | 10,12 | ND    | 19,23 | 14,15   |
| HUES 25 | ND | ND  | ND     | ND    | ND    | ND    | ND        | ND      | ND        | ND          | ND    | ND    | ND    | ND    | ND       | ND    | ND    | ND    | ND      |
| HUES 26 | 15 | X,Y | 16,17  | 11,14 | 8,11  | 25,26 | 13,18     | 6,9     | 28,31.2   | 13,20       | 12,13 | 11,11 | 8,9   | 10,10 | 11,12    | 10,12 | 9,14  | ND    | ND      |
| HUES 27 | 13 | X,Y | 15,17  | 11,14 | 8,11  | 21,23 | 13,18     | 6,9     | 28,28     | 14,20       | 12,17 | 12,13 | 8,9   | 8,10  | 9,12     | 10,12 | 9,14  | ND    | ND      |
| HUES 28 | 14 | X,X | 15,17  | 14,15 | 8,8   | 21,22 | 15,18     | 9.3,9.3 | 28,30     | 12,14       | 12,16 | 11,11 | 9,10  | 11,12 | 12,12    | 11,12 | 9,12  | ND    | ND      |
| HUES 29 | 13 | X,X | 16,17  | 11,13 | 8,8   | 21,22 | 14,15     | 6,6     | 31.2,31.2 | 14,16       | 16,18 | 11,12 | 11,12 | 8,9   | 11,12    | 10,12 | 12,12 | ND    | ND      |
| HUES 30 | 14 | X,X | 15,19  | 11,14 | 8,11  | 22,25 | 14,19     | 6,9.3   | 30,31.2   | 13,13       | 11,21 | 11,13 | 12,12 | 10,11 | 12,13    | 10,12 | 12,14 | ND    | ND      |
| HUES 31 | 11 | X,X | 16,18  | 13,13 | 8,8   | 20,21 | 16,17     | 6,9.3   | 28,30     | 14,17       | 13,20 | 11,12 | 10,12 | 8,13  | 9,11     | 11,12 | 9,13  | ND    | ND      |
| HUES 32 |    | X,Y | 15,17  | 10,14 | 8,8   | 22,23 | 14,17     | 7,8     | 29,31     | 15,18       | ND    | 13,13 | 9,11  | 10,11 | 9,11     | 10,11 | ND    | 16,17 | 14,16   |
| HUES 33 |    | X,X | 16,17  | 11,11 | 9,11  | 23,25 | 14,15     | 6,9.3   | 28,29     | 13,20       | ND    | 12,13 | 8,11  | 9,11  | 11,12    | 10,13 | ND    | 17,24 | 14,14   |
| HUES 34 |    | X,X | 16,18  | 8,8   | 8,11  | 21,24 | 15,16,20* | 6,9.3   | 28,30     | 14,17,11.2* | ND    | 11,13 | 11,12 | 9,11  | 12,12    | 11,13 | ND    | 17,18 | 14,15   |
| HUES 35 |    | X,Y | 16,18  | 10,13 | 8,11  | 20,21 | 15,20     | 9,9.3   | 28,32.2   | 15,18       | ND    | 11,13 | 8,13  | 8,10  | 10,11    | 10,11 | ND    | 17,17 | 14,14.2 |
| HUES 36 |    | X,X | 15,18  | 13,14 | 8,8   | 20,22 | 15,17     | 9,9.3   | 27,31.2   | 16,16       | ND    | 12,12 | 8,12  | 8,11  | 12,13    | 11,12 | ND    | 17,20 | 13,15   |
| HUES 37 |    | X,X | 14,18  | 14,15 | 8,11  | 20,22 | 15,17     | 7,9     | 31.2,32.2 | 14,15       | ND    | 12,13 | 8,12  | 8,10  | 12,13    | 9,21  | ND    | 17,20 | 15,17   |
| HUES 38 |    | X,Y | 15,18  | 14,15 | 8,8   | 21,24 | 17,19     | 9,9.3   | 30,32.2   | 14,16       | ND    | 11,12 | 8,12  | 8,8   | 11,12,13 | 11,12 | ND    | 17,24 | 13,14   |
| HUES 39 |    | X,X | 14,18  | 10,13 | 8,8   | 21,22 | 15,17     | 6,9.3   | 31.2,32.2 | 15,16       | ND    | 12,12 | 8,12  | 8,11  | 12,13    | 9,12  | ND    | 17,24 | 15,17   |
| HUES 40 |    | X,X | 14,18  | 13,15 | 8,8   | 22,22 | 16,17     | 6,9.3   | 27,31     | 12,17       | ND    | 12,13 | 10,11 | 9,11  | 9,11     | 10,11 | ND    | 24,24 | 13,14   |
| HUES 41 |    | X,X | 16,18  | 12,14 | 8,8   | 19,20 | 15,17     | 6,7     | 33.2,33.2 | 16,17       | ND    | 13,14 | 8,10  | 9,11  | 12,14    | 12,12 | ND    | 21,25 | 13,16   |
| HUES 42 |    | X,Y | 18*,19 | 10,15 | 8,8   | 20,24 | 18,18     | 6,9.3   | 28,31.2   | 17,20       | ND    | 11,12 | 11,11 | 9,10  | 11,12    | 11,11 | ND    | 17,24 | 14,15   |
| HUES 43 | ND | ND  | ND     | ND    | ND    | ND    | ND        | ND      | ND        | ND          | ND    | ND    | ND    | ND    | ND       | ND    | ND    | ND    | ND      |
| HUES 44 |    | X,X | 16,16  | 13,15 | 8,11  | 20,23 | 16,17     | 6,7     | 27,30     | 15,16       | ND    | 12,13 | 8,12  | 10,13 | 10,13    | 10,12 | ND    | 19,21 | 14,15.2 |
| HUES 45 |    | X,X | 16,19  | 10,13 | 8,9   | 20,24 | 16,18     | 7,7     | 30,32.2   | 13,17       | ND    | 11,11 | 11,14 | 9,12  | 11,13    | 10,11 | ND    | 17,17 | 12,15.2 |

|         |    |          |          |          |       |         |          |         |           |             |    |       |       |       |         |       |    |          |         |    |
|---------|----|----------|----------|----------|-------|---------|----------|---------|-----------|-------------|----|-------|-------|-------|---------|-------|----|----------|---------|----|
| HUES 46 |    | X,X      | 17,17    | 11,13    | 8,11  | 21,26   | 17,17    | 9,9,3   | 31.2,32.2 | 13,16       | ND | 11,12 | 12,13 | 10,12 | 11,12   | 10,11 | ND | 20,24    | 15,16   |    |
| HUES 47 |    | X,X      | 16,16    | 13,14    | 8,11  | 21.2,22 | 14,16    | 7,7     | 27,29     | 15,18       | ND | 12,13 | 12,12 | 8,12  | 10,10   | 7,12  | ND | 23,26    | 12,17.2 |    |
| HUES 48 |    | X,X      | 14,17    | 10,13    | 8,8   | 21*,24  | 15,16    | 9.3,9.3 | 30.2,31.2 | 12,13       | ND | 12,13 | 12,13 | 9,9   | 11,12   | 11,12 | ND | 20,21    | 14,15   |    |
| HUES 49 |    | X,X      | 14,18    | 12*,13   | 8,11  | 21,22   | 16,18,20 | 6,6     | 32.2,33.2 | 11.2*,14,16 | ND | 9,12  | 10,12 | 10,11 | 12,12   | 10,12 | ND | 17,17    | 14,14   |    |
| HUES 50 |    | X,X      | 14,20    | 12,14    | 9,11  | 23,23   | 16,19    | 6,9     | 29,30     | 15,15       | ND | 11,13 | 12,14 | 8,9   | 9,11    | 9,11  | ND | 17,25    | 13,14   |    |
| HUES 51 |    | X,X      | 17,17    | 11,14    | 9,12  | 23,23   | 16,19    | 7,7     | 29,32.2   | 15,16,23    | ND | 11,13 | 8,12  | 8,10  | 12,13   | 9,10  | ND | 29,32.2  | 13,14   |    |
| HUES 52 | ND | ND       | ND       | ND       | ND    | ND      | ND       | ND      | ND        | ND          | ND | ND    | ND    | ND    | ND      | ND    | ND | ND       | ND      | ND |
| HUES 53 |    | X,Y      | 17,18    | 12,14    | 8,8   | 21,23   | 15,16    | 6,7     | 30,31.2   | 15,20***    | ND | 11,12 | 11,12 | 11,12 | 11,12   | 12,13 | ND | 17,23    | 14,14   |    |
| HUES 54 |    | X,X      | 14,16    | 14,15    | 9,11  | 21,23   | 15,16    | 7,7     | 29,32     | ND          | ND | 11,12 | 9,10  | 11,11 | 9,10,13 | 7,11  | ND | 21,22    | 13,14   |    |
| HUES 55 |    | X,X      | 14,17    | 14,15    | 9,11  | 22,24   | 14,17    | 7,7     | 32.2,32.2 | 15,16       | ND | 11,11 | nd    | 9,11  | 9,10    | 11,12 | ND | 18,22    | 13,13.2 |    |
| HUES 56 |    | X,Y      | 14,17    | 14,15    | 10,11 | 21,23   | 14,17    | 7,7     | 32,32.2   | 14,16       | ND | 11,12 | 9,10  | 10,11 | 9,9     | 7,11  | ND | 18,22    | 13,13.2 |    |
| HUES 57 |    | X,X (Y*) | 14,15,16 | 14,15    | 9,11  | 23,24   | 14,15    | 7,7     | 29,32.2   | 15,16       | ND | 11,12 | 11,14 | 9,10  | 9,10,13 | 7,11  | ND | 18,21,22 | 13.2,14 |    |
| HUES 58 |    | X,X      | 14,16    | 14,15    | 10,11 | 21,23   | 15,16    | 7,7     | 32.2,32.2 | 14,19       | ND | 11,11 | 11,14 | 9,10  | 9,13    | 11,12 | ND | 18,22    | 13,14   |    |
| HUES 59 |    | X,Y      | 14,16    | 14,15    | 9,11  | 23,24   | 16,17    | 6,3,7   | 29,32     | 14,19       | ND | 11,12 | 10,11 | 10,11 | 9,13    | 7,11  | ND | 18,22    | 13.2,14 |    |
| HUES 60 |    | X,Y      | 16,17    | 14,15    | 10,11 | 21,23   | 14,15    | 6,3,7   | 29,32     | ND          | ND | 11,12 | 11,14 | 11,11 | 10,13   | 7,11  | ND | 18,22    | 13,14   |    |
| HUES 61 |    | X,X      | 14,17    | 13,16    | 9,9   | 20,21   | 16,17,20 | 9,3,9.3 | 29,30     | 14,14       | ND | 11,12 | 10,11 | 8,11  | 8,14    | 9,11  | ND | 17,24    | 13,15   |    |
| HUES 62 |    | X,X      | 16,17    | 13,13    | 8,11  | 23,24   | 15,20    | 9,9,3   | 29,31.2   | 15,16       | ND | 11,11 | 9,12  | 10,12 | 12,12   | 9,12  | ND | 20,22    | 13,14   |    |
| HUES 63 |    | X,Y      | 16,16    | 13,13    | 8,11  | 22,24   | 15,16,20 | 6,9     | 31,31.2   | ND          | ND | 11,11 | ND    | 10,12 | 12,13   | 9,12  | ND | 18,20    | 13,13   |    |
| HUES 64 |    | X,Y      | 16,16    | 12,14    | 8,10  | ND      | 15,15    | 6,9     | 31,31.2   | ND          | ND | 11,13 | ND    | 11,12 | 11,13   | 12,12 | ND | 18,20    | 13,14   |    |
| HUES 65 |    | X,Y      | 16,19    | 13,14,15 | 8,8   | 21,25   | 16,18,20 | 8,9,3   | 30,30     | ND          | ND | 12,13 | 9,9   | 9,12  | 12,13   | 11,12 | ND | 19,20    | 14,14   |    |
| HUES 66 |    | X,X      | 14,17    | 11,14    | 8,8   | 21,23   | 17,17    | 6,7     | 31.2,32.2 | 15,15       | ND | 9,11  | 12,12 | 11,12 | 11,12   | 11,12 | ND | 20,23    | 14,15   |    |

**Table S5. Comparison of Derivation Efficiencies to Previous Reports**

| Authors                      | Method                                                       | # embryos                | # blastocysts | # of blastocysts used for derivation | day of derivation | # cell lines | % derivation efficiency <sup>‡</sup> |
|------------------------------|--------------------------------------------------------------|--------------------------|---------------|--------------------------------------|-------------------|--------------|--------------------------------------|
| Thomson <i>et al.</i> 1998   | Immunosurgery                                                | 36 (fresh and frozen)    | 20            | 14                                   |                   | 5            | 35%                                  |
| Cowan <i>et al.</i> 2004     | Immunosurgery                                                | 344 (frozen)             | N/A           | 97                                   | 5-7               | 17           | 18%                                  |
| Lerou <i>et al.</i> , 2008   | No Isolation                                                 | 242 (fresh, low quality) | 94            | 94                                   | 5                 | 8            | 8.5%                                 |
| Stojkovic <i>et al.</i> 2004 | Immunosurgery                                                | 11                       | 7             | 7                                    | 8                 | 1            | 14%                                  |
| This study                   | No isolation, Immunosurgery, or Laser-mediated ICM isolation | 584 (frozen)             | 156*          | 140                                  | 5-9               | 45           | 32%                                  |
| This Study                   | Laser-mediated ICM isolation, (day6)                         |                          |               | 19                                   | 6                 | 11           | 58%                                  |

<sup>‡</sup>expressed as % according to the number of cell lines obtained per total number of blastocysts used for derivation. The developmental time of derivation is indicated in parenthesis. N/A: data not available. \* 16 blastocysts were used for antibody staining, leaving 140 blastocysts of high and low quality (Table S2) for derivation.
